# Supplementary material for: NHR-23 and SPE-44 regulate distinct sets of genes during Caenorhabditis elegans spermatogenesis
Source: PubMed Central journal article supplement (PMC9635660; doi:10.1093/g3journal/jkac256), 2022-09-22
Supplement: jkac256_supplementary_figure_s1.pdf [file jkac256_supplementary_figure_s1.pdf]

**A)**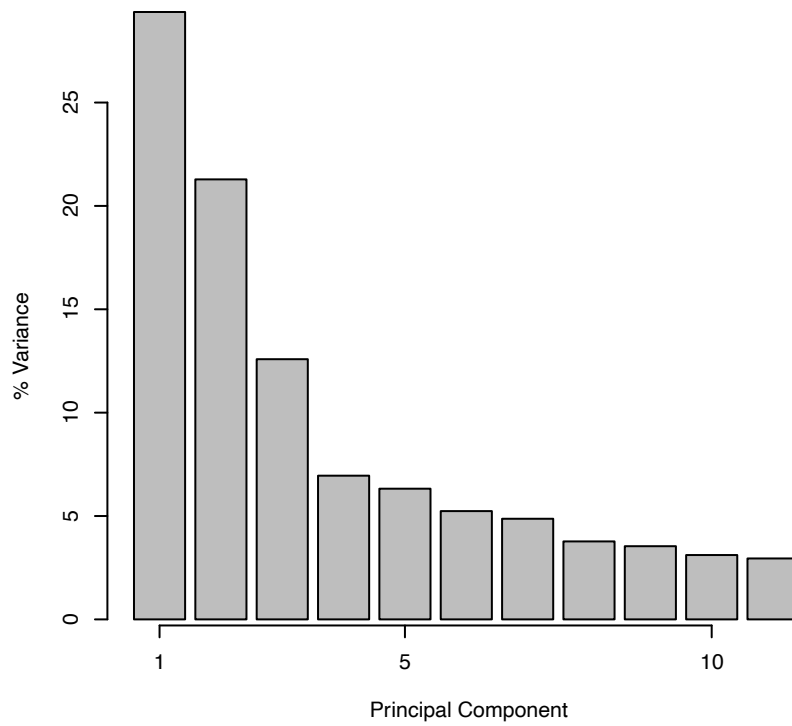**B)**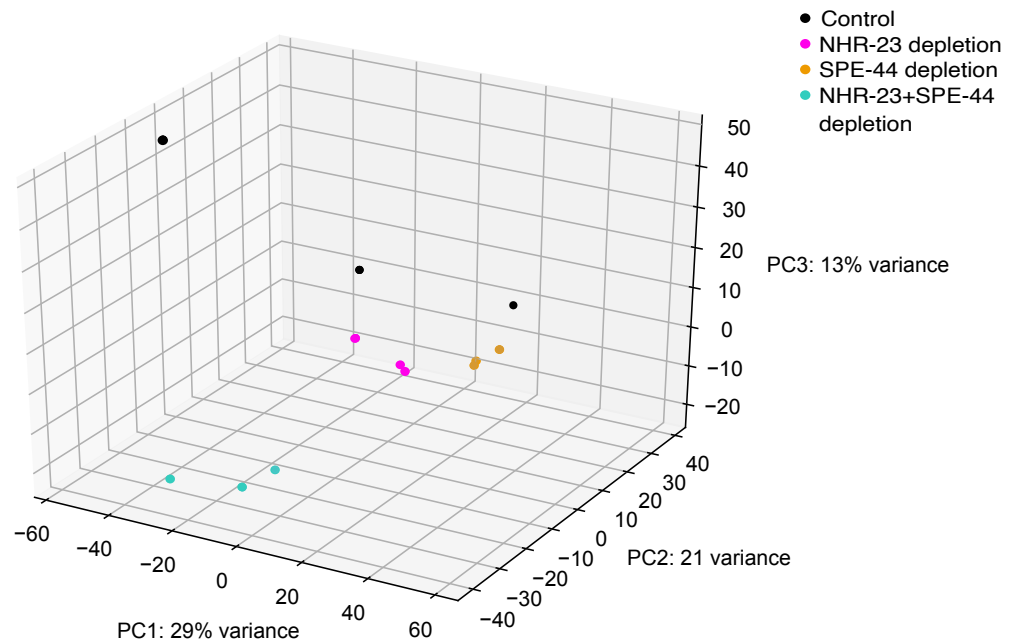

**Figure S1. Analysis of RNA-seq dataset variance.** (A) Scree plot depicting the percent variance associated with eleven principal components. (B) 3D Principal component analysis of RNA-seq data. Legend indicates which colored dots belong to control, NHR-23-depleted, SPE-44-depleted, or NHR-23+SPE-44-depleted biological replicates.
