# Supplementary material for: NHR-23 and SPE-44 regulate distinct sets of genes during Caenorhabditis elegans spermatogenesis
Source: PubMed Central journal article supplement (PMC9635660; doi:10.1093/g3journal/jkac256), 2022-09-22
Supplement: jkac256_supplementary_figure_s2.pdf [file jkac256_supplementary_figure_s2.pdf]

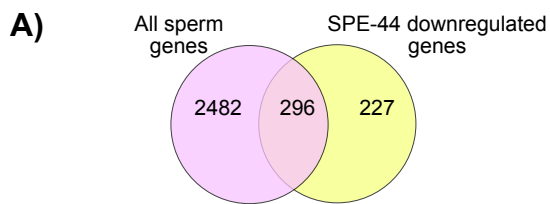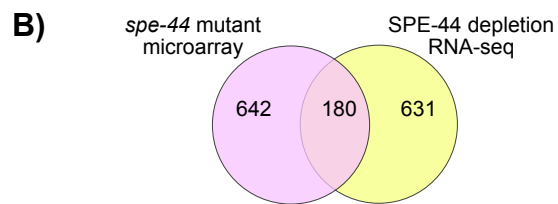

**Figure S2. Overlaps between SPE-44-downregulated genes and sperm-enriched genes, and comparison of SPE-44 RNA-seq and *spe-44* microarray datasets.** (A) Venn diagram of down-regulated genes following SPE-44 depletion and sperm-enriched genes. (B) Venn diagram of genes differentially regulated following SPE-44 depletion (this study) and a previous microarray experiment comparing gene expression in L4 males between *spe-44* null mutants and wild-type animals (Kulkarni et al. 2012).
