# Supplementary material for: NHR-23 and SPE-44 regulate distinct sets of genes during Caenorhabditis elegans spermatogenesis
Source: PubMed Central journal article supplement (PMC9635660; doi:10.1093/g3journal/jkac256), 2022-09-22
Supplement: jkac256_supplementary_figure_s4.pdf [file jkac256_supplementary_figure_s4.pdf]

**Figure S4. MFP2 genomic DNA alignment.** An alignment produced with Clustal Omega (Goujon et al., 2010; Sievers et al., 2011). cDNA identity for each row and total length in basepairs is provided in the right column. An alternate potential *ZK596.2* reading frame starting 92 bp downstream from the conserved start codon is shown in *ZK596.2alt*.

```

nsph-4.3 ----- 0
nsph-4.1 ATGGCGCCGAAGCCGAATCCGCCACCAAAAAGAAGACACAT-GGGCTTTCAGCCGATTGG 59
nsph-4.2 ATGGCGCCGAAGCCGAATCCGCCACCAAAAAGAAGACACAT-GGGCTTTCAGCCGATTGG 59
ZK546.7 ATGACGCCGAAGCCGAATCCGCCACCAAAAAGAAGACACATGGAGCGTTCAGCCTATTGG 60
ZK546.7alt ----- 0

nsph-4.3 ----- 0
nsph-4.1 TTCACCGTTCCCGCCGAGTCTGTCAAATGTATGGGAGAGCAGAACATGTATGTTGCTCT 119
nsph-4.2 TTCACCGTTCCCGCCGAGTCTGTCAAATGTATGGGAGAGCAGAACATGTATGTTGCTCT 119
ZK546.7 ATCCCCATTTCGCGCCGAGCCCCGTCAAGTGTATGGGAGAGCAGAACATGTATGTTGCTCT 120
ZK546.7alt -----ATGGGAGAGCAGAACATGTATGTTGCTCT 29

nsph-4.3 ----- 0
nsph-4.1 CTGGTACAAACATGGTAAACCAATTCATGGACGTTCCCTGGAACAACGGAGGAGTGGTTGA 179
nsph-4.2 CTGGTACAAACATGGTAAACCAATTCATGGACGTTCCCTGGAACAACGGAGGAGTGGTTGA 179
ZK546.7 CTGGTACAAACATGGCAAGCCAATTCATGGGCGTTCCTGGAATAACGGAGGAGTGGTTGA 180
ZK546.7alt CTGGTACAAACATGGCAAGCCAATTCATGGGCGTTCCTGGAATAACGGAGGAGTGGTTGA 89

nsph-4.3 ----- 0
nsph-4.1 ATGCTCATTCCCATACAAGCAGGCAGAGTTGACGACCAAGCAACAGCTCGAGGGACAAAT 239
nsph-4.2 ATGCTCATTCCCATACAAGCAGGCAGAGTTGACGACCAAGCAACAGCTCGAGGGACAAAT 239
ZK546.7 ATGCTCCTTCCCATACAAGGAGGCAGAGTTGACGACCAAGCAACAGCTCGAAGGACAAAT 240
ZK546.7alt ATGCTCCTTCCCATACAAGGAGGCAGAGTTGACGACCAAGCAACAGCTCGAAGGACAAAT 149

nsph-4.3 ----- 0
nsph-4.1 TCAGGTGCTCCAGTATGTGCGGAGATCACAAACCAAGGATTCTGGTATGAATGGATCAA 299
nsph-4.2 TCAGGTGCTCCAGTATGTGCGGAGATCACAAACCAAGGATTCTGGTATGAATGGATCAA 299
ZK546.7 CCAGGTTCTGCAGTATGTTGGAGATCACAAACCAAGGATTCTGGTATGAATGGATCAA 300
ZK546.7alt CCAGGTTCTGCAGTATGTTGGAGATCACAAACCAAGGATTCTGGTATGAATGGATCAA 209

nsph-4.3 ----- 0
nsph-4.1 ATACAAGGATCGTATTGAGAAGATCGACGACAAACATCAACTTGTTGCTGTGGAGATTC 359
nsph-4.2 ATACAAGGATCGTATTGAGAAGATCGACGACAAACATCAACTTGTTGCTGTGGAGATTC 359
ZK546.7 ATACAAGGATCGCATTGAGAAGATCGATGACAAGCATCAACTTGTTGCTGTGGGGATTC 360
ZK546.7alt ATACAAGGATCGCATTGAGAAGATCGATGACAAGCATCAACTTGTTGCTGTGGGGATTC 269

nsph-4.3 ----- 0
nsph-4.1 GTTCCCAATCTTCTGGAAGAGAAAGGAAGGCAATCTTCTTGGATACGTTGACAATAAGAC 419
nsph-4.2 GTTCCCAATCTTCTGGAAGAGAAAGGAAGGCAATCTTCTTGGATACGTTGACAATAAGAC 419
ZK546.7 TTTCCCAATCTTCTGGAAGAGAAAGGAAGGAAATCTCCTTGGATACGTCGACAACAAGAC 420
ZK546.7alt TTTCCCAATCTTCTGGAAGAGAAAGGAAGGAAATCTCCTTGGATACGTCGACAACAAGAC 329

nsph-4.3 ----- 0
nsph-4.1 GGAGGAAGGATGGTTCTCGTTCAATGGCAAGGTGATCAAACAAGTCCGACCACAGTTGAA 479
nsph-4.2 GGAGGAAGGATGGTTCTCGTTCAATGGCAAGGTGATCAAACAAGTCCGACCACAGTTGAA 479
ZK546.7 AGAGGAAGGATGGTTCTCGTTCAACGGAAAAGTATCAAACAAGTCCGACCACAGTTGAA 480
ZK546.7alt AGAGGAAGGATGGTTCTCGTTCAACGGAAAAGTATCAAACAAGTCCGACCACAGTTGAA 389

```

nsph-4.3 ----- 0  
nsph-4.1 TGAAATGTACATCATCACTCGCAACTGCATCGGAGGACCACCACACTGCGAATGCGAGAA 539  
nsph-4.2 TGAAATGTACATCATCACTCGCAACTGCATCGGAGGACCACCACACTGCGAATGCGAGAA 539  
ZK546.7 TGACATGTACATCATCACTCGTAACTGCGTCGGAGGACCACCATACTGCGAGTGTGAGAA 540  
ZK546.7alt TGACATGTACATCATCACTCGTAACTGCGTCGGAGGACCACCATACTGCGAGTGTGAGAA 449

nsph-4.3 -----ATGTATGGGAGAGCAGAATATG- 22  
nsph-4.1 CTGTCTTAAACCACCACCACCACCACCAATCCCACCACCGGGCCACCACCACCACGTGT 599  
nsph-4.2 CTGTCTTAAACCACCACCACCACCACCAATCCCACCACCGGGCCACCACCACCACGTGT 599  
ZK546.7 CTGTCCGAAGCTTCCGCCACCACCACCAATCCCACCACCGGGCCACCACCACCACGTGT 600  
ZK546.7alt CTGTCCGAAGCTTCCGCCACCACCACCAATCCCACCACCGGGCCACCACCACCACGTGT 509  
\* \* \* \* \*

nsph-4.3 -T-AACTGGCTCTCTGATGCAAAAATGGAAGCCAATCCATGGACGTTCTTGGAA----C 76  
nsph-4.1 CATAACGACGAATGGATCGATATCCGAGAGGGAGATCCATGGCCTACTCGCAAGCTTGT 659  
nsph-4.2 CATAACGACGAATGGATCGATATCCGAGAGGGAGATCCATGGCCTACTCGCAAGCTTGT 659  
ZK546.7 CTAAGCAGCAATGGATCGACATCCCGAGGGAGATCCATGGCCAACCTCGAAGCTTGT 660  
ZK546.7alt CATGCACGACGAATGGATCGACATCCCGAGGGAGATCCATGGCCAACCTCGAAGCTTGT 569  
\* \* \* \* \* \* \* \* \* \* \* \* \*

nsph-4.3 ACCGAGGAGTGTGCGAGTCTCGTTCATACAGGAGTTAGCGCCGATCAGTATGTTGC 136  
nsph-4.1 TCAAGCTTTGGATAAGTCTTTGGATACTCTTCCAGGAGTCAGTGCAGATCAATATGTTGC 719  
nsph-4.2 TCAAGCTTTGGATAAGTCTTTGGATACTCTTCCAGGAGTCAGTGCAGATCAATATGTTGC 719  
ZK546.7 TAAAGCTTTGGACAAATCCTTGGACACCTTCCAGGAGTCAGTGCAGATCAGTATGTTGC 720  
ZK546.7alt TAAAGCTTTGGACAAATCCTTGGACACCTTCCAGGAGTCAGTGCAGATCAGTATGTTGC 629  
\* \* \* \* \* \* \* \* \* \* \* \* \*

nsph-4.3 CTTGTGGTACATGCAGGGTGAACCTGCCATGGGTTCGTGATTTATATCGAGGGAGGAAAGG 196  
nsph-4.1 CTTGTGGTACATGCAGGGTGAACCTGTTATGGGTTCGTGCTTGA-ATGAGGGAGGAAAGG 778  
nsph-4.2 CTTGTGGTACATGCAGGGTGAACCTGTTATGGGTTCGTGCTTGA-ATGAGGGAGGAAAGG 778  
ZK546.7 CTTGTGGTACATGCAGGGTGAACCTGTCATGGGTTCGTGTTTGA-ATGAGGGAGGAAAGG 779  
ZK546.7alt CTTGTGGTACATGCAGGGTGAACCTGTCATGGGTTCGTGTTTGA-ATGAGGGAGGAAAGG 688  
\*\*\*\*\* \* \* \*\*\*\*\*

nsph-4.3 TTGCAGCCAACTTCTCTTGGTTCAACAACGATTACTGCAAGAGCGTTGGTTCCATTTCAGT 256  
nsph-4.1 TTGCTGCCAACTTCTCTTGGTTCAACAACGAATACTGCAAGAACGTTGGATCCATTCAAT 838  
nsph-4.2 TTGCTGCCAACTTCTCTTGGTTCAACAACGAATACTGCAAGAACGTTGGATCCATTCAAT 838  
ZK546.7 TTGCGCCAACTTCTCTTGGTTCAACAATGAATATTGCAAGAACGTTGGTCCATTTCAGT 839  
ZK546.7alt TTGCGCCAACTTCTCTTGGTTCAACAATGAATATTGCAAGAACGTTGGTCCATTTCAGT 748  
\*\*\*\* \* \* \* \* \* \* \* \* \* \* \* \* \*

nsph-4.3 TGCTTGTACGTCTCGGACCACAGGTTGTTGGACACGAGTATGGATGGATTCCATTCCCAG 316  
nsph-4.1 TGCTTGTTCGTCTTGGACCACACGTCGTTGGATACGAGTATGGATGGATTCCATTCCCAG 898  
nsph-4.2 TGCTTGTTCGTCTTGGACCACACGTCGTTGGATACGAGTATGGATGGATTCCATTCCCAG 898  
ZK546.7 TGCTCGTCCGTCTCGGACCACACGTCGTTGGATACGAATATGGTTGGATTCCATTCCCAG 899  
ZK546.7alt TGCTCGTCCGTCTCGGACCACACGTCGTTGGATACGAATATGGTTGGATTCCATTCCCAG 808  
\*\*\*\* \* \* \* \* \* \* \* \* \* \* \* \* \*

nsph-4.3 AACCTGCCAACTTCGATGCTGGAAAAATCTGGAAGCCAGTGCACGTTAACAATCACAAAGG 376  
nsph-4.1 AAGCTGCCAACTTTGATGCTGGAAAGATCTGGAAGCCAGTTCACGTTAACAACCACAAGG 958  
nsph-4.2 AAGCTGCCAACTTTGATGCTGGAAAGATCTGGAAGCCAGTTCACGTTAACAACCACAAGG 958  
ZK546.7 AAGCTGCCAACTTCGACGCTGGAAAGATCTGGAAGCCAGTGCACGTTAACAACCACAAGG 959  
ZK546.7alt AAGCTGCCAACTTCGACGCTGGAAAGATCTGGAAGCCAGTGCACGTTAACAACCACAAGG 868  
\*\* \* \* \* \* \* \* \* \* \* \* \* \* \*

nsph-4.3 GAGACATCTCTTTGGAGTCGTTAACCTCCCATGTGAAAAGCAAATCTTTGCCAAAGTTCG 436  
nsph-4.1 GAGACATCTCAGTTGGAGTCGTTAACCTGCCAGGCGGAAAACAGATCCTTGCCAAGGTTG 1018  
nsph-4.2 GAGACATCTCAGTTGGAGTCGTTAACCTTCCAGGCGGAAAACAGATCCTTGCCAAGGTTG 1018  
ZK546.7 GAGATATTTCTGTTGGAGTGGTTAACCTTCCAGGCGGAAAACAGATCCTTGCCAAGGTCG 1019  
ZK546.7alt GAGATATTTCTGTTGGAGTGGTTAACCTTCCAGGCGGAAAACAGATCCTTGCCAAGGTCG 928  
\*\*\*\* \* \* \* \* \* \* \* \* \* \* \* \* \*
